# Supplementary material
Source: MDPI journal article supplement (https://www.mdpi.com/1424-2818/16/2/127)
Supplement: s1 [file s1]

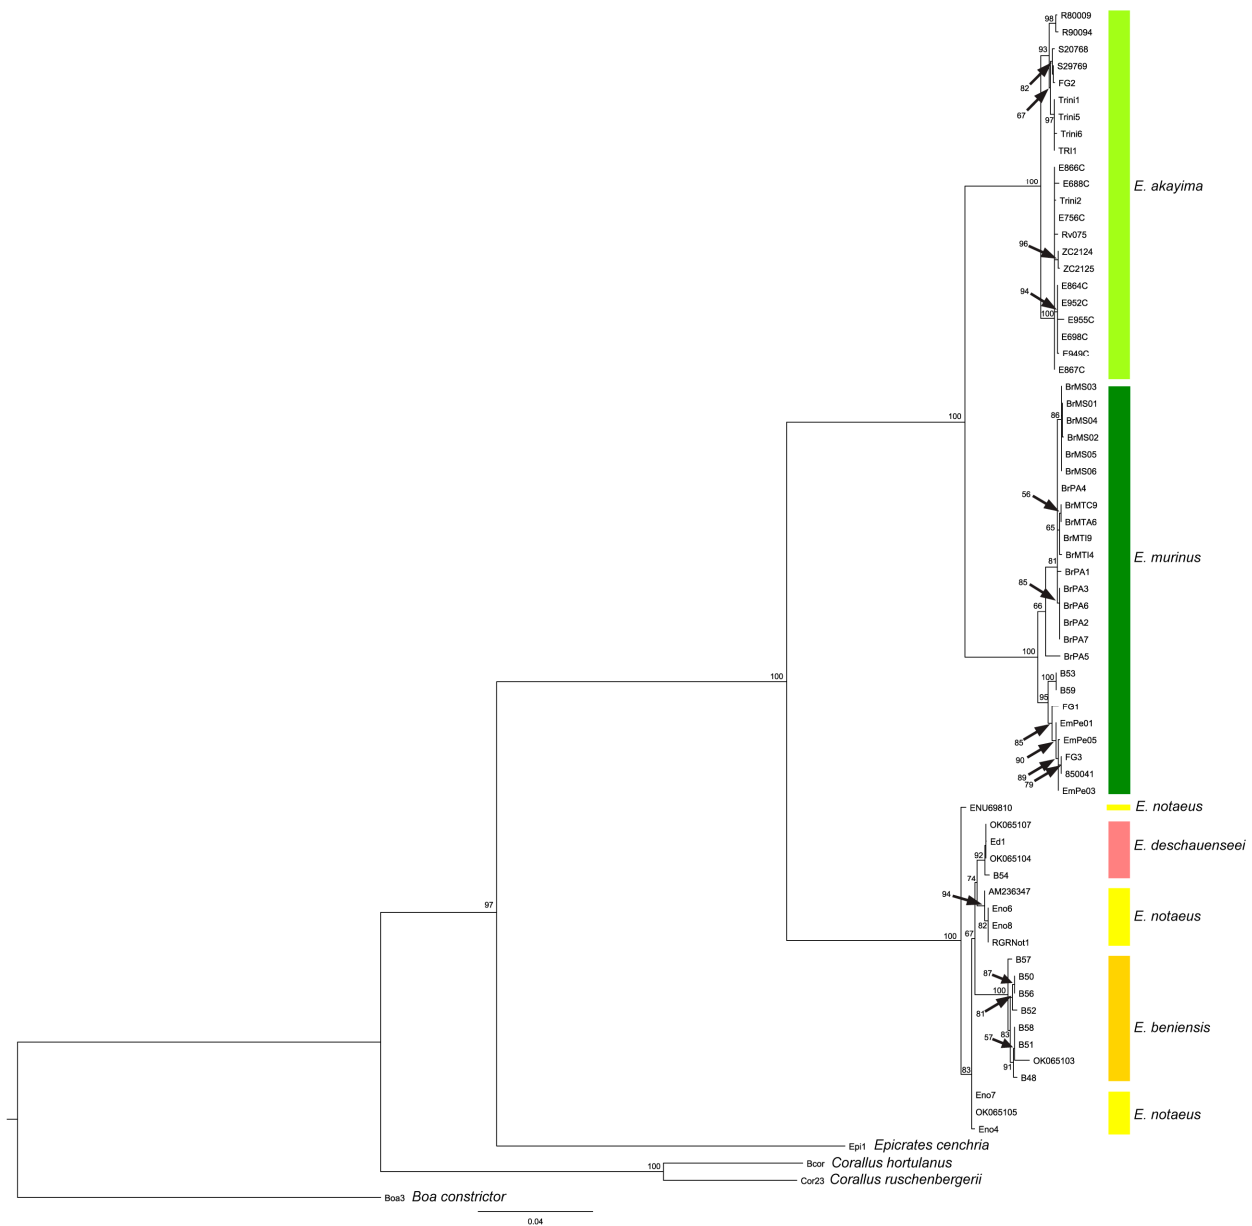

Figure S1. Phylogeny constructed from mitochondrial three gene concatenated partitioned Maximum Likelihood analysis. Branches display bootstrap support values (note some branch tip values were omitted). Refer to Table S1 for details on tip labels.

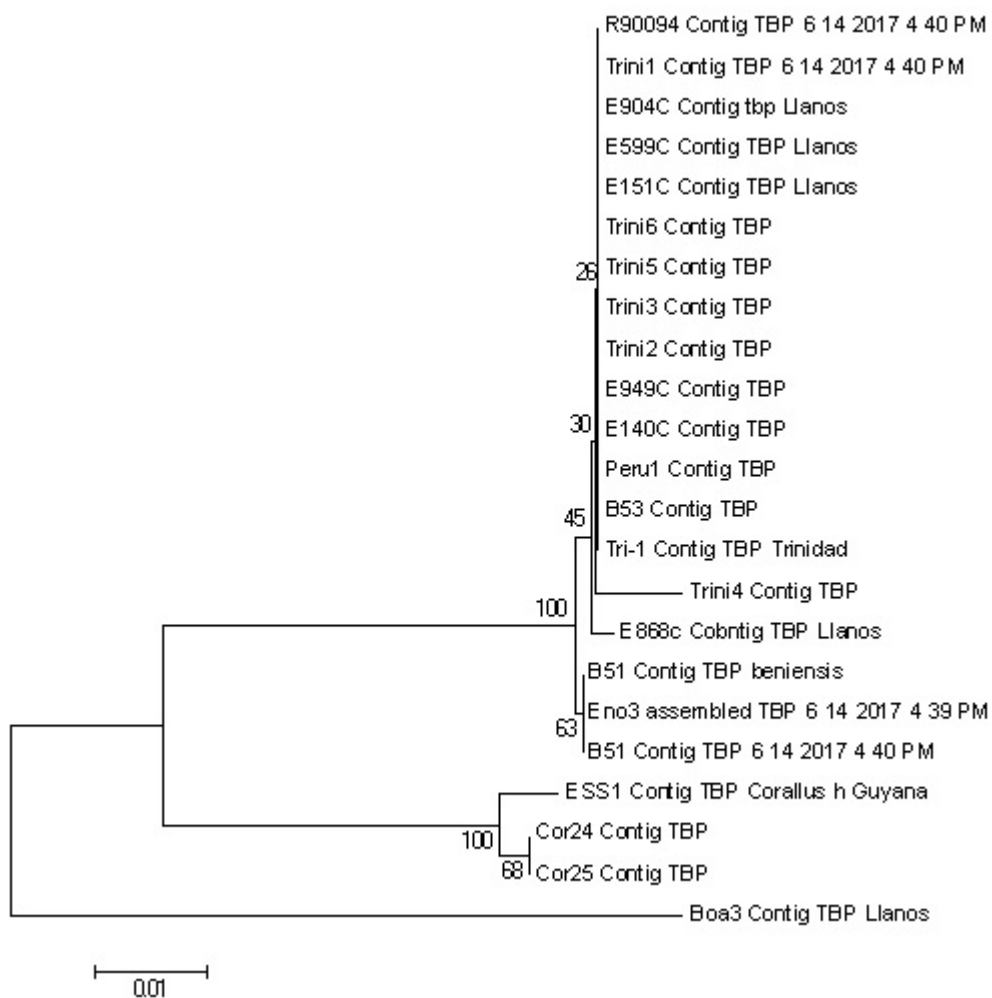

Figure S2. Maximum likelihood tree with TBP showing lack of resolution between the *E. murinus* samples and only a small difference between *E. murinus* and *E. notaeus*.

**Table S1: Genetic samples analyzed in this study**

| ID       | Species                         | Country                    | Cytb Accession #<br>(X = no sequence) | ND2 Accession #<br>(X=no sequence) | ND4 Accession #<br>(X=no sequence) | Publication                  | Museum Specimen<br>Voucher ID, Paratype, Lectotype |
|----------|---------------------------------|----------------------------|---------------------------------------|------------------------------------|------------------------------------|------------------------------|----------------------------------------------------|
| 850041   | <i>Eunectes murinus</i>         | Peru                       | PP273560                              | PP334792                           | PP334848                           | Rivas et al. 2024 this paper |                                                    |
| AM236347 | <i>Eunectes notaeus</i>         | unknown                    | AM236347                              | AM236347                           | AM236347                           | Douglas et al., 2006         |                                                    |
| B48      | <i>Eunectes beniensis</i>       | Bolivia                    | PP273561                              | PP334793                           | PP334849                           | Rivas et al. 2024 this paper |                                                    |
| B50      | <i>Eunectes beniensis</i>       | Bolivia                    | X                                     | PP334794                           | PP334850                           | Rivas et al. 2024 this paper |                                                    |
| B51      | <i>Eunectes beniensis</i>       | Bolivia                    | PP273562                              | PP334795                           | PP334851                           | Rivas et al. 2024 this paper |                                                    |
| B52      | <i>Eunectes beniensis</i>       | Bolivia                    | PP273563                              | PP334796                           | PP334852                           | Rivas et al. 2024 this paper |                                                    |
| B53      | <i>Eunectes murinus</i>         | Bolivia                    | PP273564                              | PP334797                           | PP334853                           | Rivas et al. 2024 this paper |                                                    |
| B54      | <i>Eunectes deschauenseei</i>   | Bolivia                    | PP273565                              | PP334798                           | PP334854                           | Rivas et al. 2024 this paper |                                                    |
| B56      | <i>Eunectes beniensis</i>       | Bolivia                    | PP273566                              | PP334799                           | PP334855                           | Rivas et al. 2024 this paper |                                                    |
| B57      | <i>Eunectes beniensis</i>       | Bolivia                    | PP273567                              | PP334800                           | PP334856                           | Rivas et al. 2024 this paper |                                                    |
| B58      | <i>Eunectes beniensis</i>       | Bolivia                    | PP273568                              | PP334801                           | PP334857                           | Rivas et al. 2024 this paper |                                                    |
| B59      | <i>Eunectes murinus</i>         | Bolivia                    | PP273569                              | PP334802                           | PP334858                           | Rivas et al. 2024 this paper |                                                    |
| Bcor     | <i>Corallus hortulanus</i>      | Bolivia                    | PP273570                              | PP334803                           | PP334859                           | Rivas et al. 2024 this paper |                                                    |
| Boa3     | <i>Boa constrictor</i>          | Venezuela                  | PP273571                              | X                                  | PP334860                           | Rivas et al. 2024 this paper |                                                    |
| BrMS01   | <i>Eunectes murinus</i>         | Brazil, Mato Grosso do Sul | PP273572                              | PP334804                           | PP334861                           | Rivas et al. 2024 this paper |                                                    |
| BrMS02   | <i>Eunectes murinus</i>         | Brazil, Mato Grosso do Sul | PP273573                              | PP334805                           | PP334862                           | Rivas et al. 2024 this paper |                                                    |
| BrMS03   | <i>Eunectes murinus</i>         | Brazil, Mato Grosso do Sul | X                                     | PP334806                           | PP334863                           | Rivas et al. 2024 this paper |                                                    |
| BrMS04   | <i>Eunectes murinus</i>         | Brazil, Mato Grosso do Sul | PP273574                              | PP334807                           | PP334864                           | Rivas et al. 2024 this paper |                                                    |
| BrMS05   | <i>Eunectes murinus</i>         | Brazil, Mato Grosso do Sul | PP273575                              | PP334808                           | PP334865                           | Rivas et al. 2024 this paper |                                                    |
| BrMS06   | <i>Eunectes murinus</i>         | Brazil, Mato Grosso do Sul | PP273576                              | PP334809                           | PP334866                           | Rivas et al. 2024 this paper |                                                    |
| BrMTA6   | <i>Eunectes murinus</i>         | Brazil, Mato Grosso        | PP273577                              | X                                  | PP334867                           | Rivas et al. 2024 this paper |                                                    |
| BrMTC9   | <i>Eunectes murinus</i>         | Brazil, Mato Grosso        | PP273578                              | PP334810                           | PP334868                           | Rivas et al. 2024 this paper |                                                    |
| BrMTI4   | <i>Eunectes murinus</i>         | Brazil, Mato Grosso        | PP273579                              | PP334811                           | PP334869                           | Rivas et al. 2024 this paper |                                                    |
| BrMTI9   | <i>Eunectes murinus</i>         | Brazil, Mato Grosso        | PP273580                              | PP334812                           | PP334870                           | Rivas et al. 2024 this paper |                                                    |
| BrPA1    | <i>Eunectes murinus</i>         | Brazil, Para               | PP273581                              | PP334813                           | PP334871                           | Rivas et al. 2024 this paper |                                                    |
| BrPA2    | <i>Eunectes murinus</i>         | Brazil, Para               | PP273582                              | PP334814                           | PP334872                           | Rivas et al. 2024 this paper |                                                    |
| BrPA3    | <i>Eunectes murinus</i>         | Brazil, Para               | PP273583                              | PP334815                           | PP334873                           | Rivas et al. 2024 this paper |                                                    |
| BrPA4    | <i>Eunectes murinus</i>         | Brazil, Para               | PP273584                              | PP334816                           | X                                  | Rivas et al. 2024 this paper |                                                    |
| BrPA5    | <i>Eunectes murinus</i>         | Brazil, Para               | PP273585                              | PP334817                           | PP334874                           | Rivas et al. 2024 this paper |                                                    |
| BrPA6    | <i>Eunectes murinus</i>         | Brazil, Para               | PP273586                              | PP334818                           | PP334875                           | Rivas et al. 2024 this paper | MPEG:27428, <i>E. murinus</i> lectotype            |
| BrPA7    | <i>Eunectes murinus</i>         | Brazil, Para               | PP273587                              | PP334819                           | PP334876                           | Rivas et al. 2024 this paper |                                                    |
| Cor23    | <i>Corallus ruschenbergerii</i> | Venezuela                  | PP273588                              | PP334820                           | PP334877                           | Rivas et al. 2024 this paper |                                                    |
| E688C    | <i>Eunectes akayima</i>         | Venezuela                  | PP273589                              | PP334821                           | PP334878                           | Rivas et al. 2024 this paper |                                                    |
| E698C    | <i>Eunectes akayima</i>         | Venezuela                  | PP273590                              | PP334822                           | PP334879                           | Rivas et al. 2024 this paper |                                                    |
| E756C    | <i>Eunectes akayima</i>         | Venezuela                  | PP273591                              | PP334823                           | PP334880                           | Rivas et al. 2024 this paper |                                                    |
| E864C    | <i>Eunectes akayima</i>         | Venezuela                  | PP273592                              | PP334824                           | PP334881                           | Rivas et al. 2024 this paper |                                                    |
| E866C    | <i>Eunectes akayima</i>         | Venezuela                  | PP273593                              | PP334825                           | PP334882                           | Rivas et al. 2024 this paper |                                                    |
| E867C    | <i>Eunectes akayima</i>         | Venezuela                  | PP273594                              | PP334826                           | PP334883                           | Rivas et al. 2024 this paper |                                                    |
| E949C    | <i>Eunectes akayima</i>         | Venezuela                  | PP273595                              | PP334827                           | PP334884                           | Rivas et al. 2024 this paper |                                                    |
| E952C    | <i>Eunectes akayima</i>         | Venezuela                  | PP273596                              | PP334828                           | PP334885                           | Rivas et al. 2024 this paper |                                                    |
| E955C    | <i>Eunectes akayima</i>         | Venezuela                  | PP273597                              | PP334829                           | PP334886                           | Rivas et al. 2024 this paper |                                                    |

|          |                                |               |          |          |          |                                        |                                              |
|----------|--------------------------------|---------------|----------|----------|----------|----------------------------------------|----------------------------------------------|
| Ed1      | <i>Eunectes deschau-enseei</i> | French Guiana | PP273598 | PP334830 | PP334887 | Rivas et al. 2024 this paper           | MHNT:QM325                                   |
| EmPe01   | <i>Eunectes murinus</i>        | Peru          | PP273599 | PP334831 | X        | Rivas et al. 2024 this paper           |                                              |
| EmPe03   | <i>Eunectes murinus</i>        | Peru          | PP273600 | PP334832 | PP334888 | Rivas et al. 2024 this paper           |                                              |
| EmPe05   | <i>Eunectes murinus</i>        | Peru          | PP273601 | PP334833 | PP334889 | Rivas et al. 2024 this paper           |                                              |
| Eno4     | <i>Eunectes notaeus</i>        | Unknown       | PP273602 | X        | X        | Rivas et al. 2024 this paper           |                                              |
| Eno6     | <i>Eunectes notaeus</i>        | Unknown       | PP273603 | X        | X        | Rivas et al. 2024 this paper           |                                              |
| Eno7     | <i>Eunectes notaeus</i>        | Unknown       | PP273604 | X        | X        | Rivas et al. 2024 this paper           |                                              |
| Eno8     | <i>Eunectes notaeus</i>        | Unknown       | PP273605 | X        | X        | Rivas et al. 2024 this paper           |                                              |
| ENU69810 | <i>Eunectes notaeus</i>        | unknown       | U69810   | X        | X        | Campbell 1997 Dissertation Queens Univ |                                              |
| Epi1     | <i>Epicrates cenchria</i>      | Venezuela     | PP273606 | X        | PP334890 | Rivas et al. 2024 this paper           |                                              |
| FG1      | <i>Eunectes murinus</i>        | French Guiana | PP273607 | PP334834 | PP334891 | Rivas et al. 2024 this paper           | MHNT:QM328                                   |
| FG2      | <i>Eunectes akayima</i>        | French Guiana | PP273608 | PP334835 | PP334892 | Rivas et al. 2024 this paper           | MHNT:AF1590                                  |
| FG3      | <i>Eunectes murinus</i>        | French Guiana | PP273609 | PP334836 | PP334893 | Rivas et al. 2024 this paper           | MHNT:AF1584                                  |
| OK065103 | <i>Eunectes beniensis</i>      | unknown       | OK065103 | X        | X        | Tarkhnishvili et al. 2022              |                                              |
| OK065104 | <i>Eunectes deschau-enseei</i> | unknown       | OK065104 | X        | X        | Tarkhnishvili et al. 2022              |                                              |
| OK065105 | <i>Eunectes notaeus</i>        | unknown       | OK065105 | X        | X        | Tarkhnishvili et al. 2022              |                                              |
| OK065107 | <i>Eunectes deschau-enseei</i> | unknown       | OK065107 | X        | X        | Tarkhnishvili et al. 2022              |                                              |
| R80009   | <i>Eunectes akayima</i>        | Guyana        | PP273610 | PP334837 | PP334894 | Rivas et al. 2024 this paper           |                                              |
| R90094   | <i>Eunectes akayima</i>        | Guyana        | PP273611 | PP334838 | PP334895 | Rivas et al. 2024 this paper           |                                              |
| RGRNot1  | <i>Eunectes notaeus</i>        | unknown       | KC329953 | X        | KC329978 | Reynolds et al. 2013 Mol Phy Evo       |                                              |
| Rv075    | <i>Eunectes akayima</i>        | Guyana        | PP273612 | PP334839 | PP334896 | Rivas et al. 2024 this paper           |                                              |
| S20768   | <i>Eunectes akayima</i>        | Suriname      | PP273613 | PP334840 | PP334897 | Rivas et al. 2024 this paper           | RMNH.RENA.20768 , <i>E. akayima</i> paratype |
| S20769   | <i>Eunectes akayima</i>        | Suriname      | PP273614 | PP334841 | PP334898 | Rivas et al. 2024 this paper           | RMNH.RENA.29769                              |
| TRI1     | <i>Eunectes akayima</i>        | Trinidad      | PP273615 | PP334842 | PP334899 | Rivas et al. 2024 this paper           |                                              |
| Trini1   | <i>Eunectes akayima</i>        | Trinidad      | PP273616 | PP334843 | PP334900 | Rivas et al. 2024 this paper           |                                              |
| Trini2   | <i>Eunectes akayima</i>        | Trinidad      | PP273617 | PP334844 | PP334901 | Rivas et al. 2024 this paper           |                                              |
| Trini5   | <i>Eunectes akayima</i>        | Trinidad      | PP273618 | PP334845 | PP334902 | Rivas et al. 2024 this paper           |                                              |
| Trini6   | <i>Eunectes akayima</i>        | Trinidad      | PP273619 | PP334846 | PP334903 | Rivas et al. 2024 this paper           |                                              |
| ZC2124   | <i>Eunectes akayima</i>        | Ecuador       | PP273620 | X        | PP334904 | Rivas et al. 2024 this paper           |                                              |
| ZC2125   | <i>Eunectes akayima</i>        | Ecuador       | PP273621 | PP334847 | PP334905 | Rivas et al. 2024 this paper           |                                              |

Table S2: Mean pairwise genetic distances between and within known and candidate species of the *Eunectes* species complex. *E. notaeus* of individual genes .

| <b>CytB</b>             | <i>E. murinus</i> | <i>E. akayima</i> | <i>E. notaeus1</i>  | <i>E. beniensis</i> | <i>E. deschauenseei</i> |
|-------------------------|-------------------|-------------------|---------------------|---------------------|-------------------------|
| <i>E. murinus</i>       |                   |                   |                     |                     |                         |
| <i>E. akayima</i>       | 5.24%             |                   |                     |                     |                         |
| <i>E. notaeus1</i>      | 11.40%            | 10.76%            |                     |                     |                         |
| <i>E. beniensis</i>     | 11.80%            | 11.84%            | 2.54%               |                     |                         |
| <i>E. deschauenseei</i> | 10.99%            | 10.66%            | 0.71%               | 2.56%               |                         |
| <i>E. notaeus 2</i>     | 10.92%            | 10.30%            | 0.75%               | 2.38%               | 0.81%                   |
| <b>ND2</b>              | <i>E. akayima</i> | <i>E. murinus</i> | <i>E. notaeus 1</i> | <i>E. beniensis</i> |                         |
| <i>E. akayima</i>       |                   |                   |                     |                     |                         |
| <i>E. murinus</i>       | 5.27%             |                   |                     |                     |                         |
| <i>E. notaeus 1</i>     | 10.45%            | 10.38%            |                     |                     |                         |
| <i>E. beniensis</i>     | 10.39%            | 10.29%            | 1.24%               |                     |                         |
| <i>E. deschauenseei</i> | 10.53%            | 10.25%            | 0.50%               | 1.60%               |                         |
| <b>ND4</b>              | <i>E. akayima</i> | <i>E. murinus</i> | <i>E. notaeus 1</i> | <i>E. beniensis</i> |                         |
| <i>E. akayima</i>       |                   |                   |                     |                     |                         |
| <i>E. murinus</i>       | 5.19%             |                   |                     |                     |                         |
| <i>E. notaeus 1</i>     | 11.38%            | 10.76%            |                     |                     |                         |
| <i>E. beniensis</i>     | 11.63%            | 10.77%            | 1.26%               |                     |                         |
| <i>E. deschauenseei</i> | 11.04%            | 10.35%            | 0.70%               | 0.76%               |                         |

Table S3. Paratypes designated in this study

| Voucher Number   | Collection                                          | Collector                    | Location                                                                                                                                          | Date    | Species           |           |
|------------------|-----------------------------------------------------|------------------------------|---------------------------------------------------------------------------------------------------------------------------------------------------|---------|-------------------|-----------|
| MCNG 1042        | UNELLEZ Museo de Ciencias Naturales                 | Jesús Rivas                  | Hato El Cedral, Los Llanos, Venezuela                                                                                                             | 1994    | <i>E. akayima</i> | Holotype  |
| MBUCV 7189       | Museo de Biología, Universidad Central de Venezuela | A. Marcano                   | Rio Cabrutica                                                                                                                                     | 09/2006 | <i>E. akayima</i> | Paratype  |
| RMNHE.RENA.20768 | Netherlands                                         | M.S. Hoogmoed & J.J.P. Paats | Suriname, Nickerie, Weg Amotopo, Kabalebo-rivier, Devis val.                                                                                      | 1980    | <i>E. akayima</i> | Paratype  |
| MPEG 27428       | Museo Emilio Goldi                                  | Emil Hernandez               | Brasil, Pará, Altamira, Sítio Andirobal de propriedade de dona Francisca. Igarapé que passa pelo sítio.<br><br>Lat =-39°16''<br>Long= -52°14'11'' | 10/2011 | <i>E. murinus</i> | Lectotype |
